# Supplementary material for: Molecular dissection of Chagas induced cardiomyopathy reveals central disease associated and druggable signaling pathways
Source: PLoS Negl Trop Dis. 2020 May 20;14(5):e0007980. doi: 10.1371/journal.pntd.0007980 (PMC7279607; doi:10.1371/journal.pntd.0007980)
Supplement: S3 Table — (XLSX) [file pntd.0007980.s007.xlsx]

## Sheet: Increased
Annotation Cluster 1	Enrichment Score: 18.97		Count	P_Value
	UP_KEYWORDS	Immunity	42	5.5e-25
	GOTERM_BP_DIRECT	immune system process	40	4.7e-24
	UP_KEYWORDS	Innate immunity	26	2.8e-15
	GOTERM_BP_DIRECT	innate immune response	29	1.7e-14
Annotation Cluster 2	Enrichment Score: 14.36		Count	P_Value
	UP_KEYWORDS	Disulfide bond	74	4.6e-16
	UP_KEYWORDS	Signal	88	1.2e-15
	UP_SEQ_FEATURE	glycosylation site:N-linked (GlcNAc...)	70	3.3e-15
	UP_SEQ_FEATURE	signal peptide	71	6e-15
	UP_SEQ_FEATURE	disulfide bond	60	1.7e-14
	UP_KEYWORDS	Glycoprotein	77	3.7e-14
Annotation Cluster 3	Enrichment Score: 9.25		Count	P_Value
	GOTERM_CC_DIRECT	extracellular region	49	8.7e-11
	GOTERM_CC_DIRECT	extracellular space	50	1.2e-10
	UP_KEYWORDS	Secreted	43	1.7e-08
Annotation Cluster 4	Enrichment Score: 6.53		Count	P_Value
	GOTERM_BP_DIRECT	defense response	13	4e-11
	INTERPRO	Interferon-inducible GTPase	8	6.5e-09
	GOTERM_CC_DIRECT	endoplasmic reticulum membrane	17	0.099
Annotation Cluster 5	Enrichment Score: 5.25		Count	P_Value
	GOTERM_CC_DIRECT	external side of plasma membrane	22	1.9e-10
	UP_SEQ_FEATURE	topological domain:Extracellular	29	2.9e-06
	GOTERM_CC_DIRECT	cell surface	25	9.4e-06
	UP_SEQ_FEATURE	topological domain:Cytoplasmic	35	0.00087
	UP_KEYWORDS	Receptor	15	0.0012
Annotation Cluster 6	Enrichment Score: 5.11		Count	P_Value
	INTERPRO	Immunoglobulin-like fold	36	1.4e-11
	INTERPRO	Immunoglobulin-like domain	30	2.2e-10
	INTERPRO	Immunoglobulin V-set	15	0.00016
	UP_KEYWORDS	Immunoglobulin domain	14	0.00037
	INTERPRO	Immunoglobulin subtype	14	0.0008
	SMART	IGv	13	0.0031
	SMART	IG	14	0.0035
Annotation Cluster 7	Enrichment Score: 4.72		Count	P_Value
	GOTERM_BP_DIRECT	cellular response to interferon-beta	17	1.8e-16
	INTERPRO	Interferon-inducible GTPase	8	6.5e-09
	GOTERM_MF_DIRECT	GTP binding	20	0.00079
	GOTERM_MF_DIRECT	GTPase activity	15	0.0017
	INTERPRO	P-loop containing nucleoside triphosphate hydrolase	24	0.032
	UP_KEYWORDS	GTP-binding	12	0.12
	UP_SEQ_FEATURE	nucleotide phosphate-binding region:GTP	10	0.16
Annotation Cluster 8	Enrichment Score: 4.24		Count	P_Value
	KEGG_PATHWAY	Antigen processing and presentation	17	3.1e-13
	UP_SEQ_FEATURE	domain:Ig-like C1-type	10	7e-11
	INTERPRO	Immunoglobulin C1-set	12	1.2e-08
	GOTERM_BP_DIRECT	antigen processing and presentation	11	3.3e-08
	KEGG_PATHWAY	Herpes simplex infection	17	3.8e-08
	KEGG_PATHWAY	Graft-versus-host disease	8	9.1e-08
	KEGG_PATHWAY	Cell adhesion molecules (CAMs)	13	1.9e-07
	INTERPRO	MHC classes I/II-like antigen recognition protein	8	2.3e-07
	KEGG_PATHWAY	Allograft rejection	8	2.4e-07
	KEGG_PATHWAY	Autoimmune thyroid disease	8	2.4e-07
	KEGG_PATHWAY	Type I diabetes mellitus	8	5.5e-07
	KEGG_PATHWAY	Phagosome	18	6.4e-07
	INTERPRO	Immunoglobulin/major histocompatibility complex, conserved site	10	9.1e-07
	UP_SEQ_FEATURE	region of interest:Connecting peptide	7	9.6e-07
	GOTERM_MF_DIRECT	peptide antigen binding	7	1.3e-06
	SMART	IGc1	10	3.6e-06
	GOTERM_CC_DIRECT	phagocytic vesicle membrane	9	1.2e-05
	BIOCARTA	CTL mediated immune response against target cells	6	1.4e-05
	KEGG_PATHWAY	Viral myocarditis	10	2.1e-05
	GOTERM_CC_DIRECT	MHC class I protein complex	5	2.8e-05
	UP_KEYWORDS	MHC I	5	3.2e-05
	UP_SEQ_FEATURE	region of interest:Alpha-2	5	7.8e-05
	UP_SEQ_FEATURE	region of interest:Alpha-1	5	7.8e-05
	GOTERM_BP_DIRECT	antigen processing and presentation of exogenous peptide antigen via MHC class I, TAP-dependent	8	0.00013
	INTERPRO	MHC class I-like antigen recognition	5	0.00021
	INTERPRO	MHC class I, alpha chain, alpha1/alpha2	5	0.00021
	GOTERM_BP_DIRECT	positive regulation of T cell mediated cytotoxicity	5	0.00065
	GOTERM_BP_DIRECT	antigen processing and presentation of peptide antigen via MHC class I	5	0.00065
	UP_SEQ_FEATURE	region of interest:Alpha-3	4	0.0011
	GOTERM_BP_DIRECT	antigen processing and presentation of endogenous peptide antigen via MHC class I via ER pathway, TAP-dependent	4	0.0012
	GOTERM_MF_DIRECT	T cell receptor binding	4	0.0024
	GOTERM_CC_DIRECT	integral component of lumenal side of endoplasmic reticulum membrane	4	0.0036
	KEGG_PATHWAY	HTLV-I infection	10	0.004
	GOTERM_MF_DIRECT	TAP binding	3	0.0077
	KEGG_PATHWAY	Epstein-Barr virus infection	8	0.012
	GOTERM_MF_DIRECT	beta-2-microglobulin binding	3	0.015
	BIOCARTA	Ras-Independent pathway in NK cell-mediated cytotoxicity	4	0.02
	GOTERM_CC_DIRECT	Golgi medial cisterna	3	0.056
	GOTERM_MF_DIRECT	protein heterodimerization activity	11	0.11
	GOTERM_CC_DIRECT	endoplasmic reticulum exit site	3	0.12
	GOTERM_BP_DIRECT	negative regulation of neuron projection development	4	0.12
	GOTERM_MF_DIRECT	peptide binding	5	0.21
	GOTERM_MF_DIRECT	receptor binding	8	0.41
	KEGG_PATHWAY	Endocytosis	7	0.67
	KEGG_PATHWAY	Viral carcinogenesis	4	0.7
Annotation Cluster 9	Enrichment Score: 4.02		Count	P_Value
	GOTERM_CC_DIRECT	lysosome	19	2.2e-05
	UP_KEYWORDS	Lysosome	16	4.7e-05
	KEGG_PATHWAY	Lysosome	11	0.00082
Annotation Cluster 10	Enrichment Score: 3.96		Count	P_Value
	KEGG_PATHWAY	Graft-versus-host disease	8	9.1e-08
	INTERPRO	MHC classes I/II-like antigen recognition protein	8	2.3e-07
	KEGG_PATHWAY	Allograft rejection	8	2.4e-07
	KEGG_PATHWAY	Autoimmune thyroid disease	8	2.4e-07
	KEGG_PATHWAY	Type I diabetes mellitus	8	5.5e-07
	UP_SEQ_FEATURE	region of interest:Connecting peptide	7	9.6e-07
	GOTERM_BP_DIRECT	antigen processing and presentation of exogenous peptide antigen via MHC class II	7	1.1e-06
	KEGG_PATHWAY	Leishmaniasis	7	0.00037
	KEGG_PATHWAY	Rheumatoid arthritis	7	0.00066
	GOTERM_CC_DIRECT	MHC class II protein complex	4	0.0011
	KEGG_PATHWAY	Asthma	4	0.0024
	KEGG_PATHWAY	Inflammatory bowel disease (IBD)	4	0.013
	GOTERM_BP_DIRECT	antigen processing and presentation of peptide or polysaccharide antigen via MHC class II	3	0.014
	INTERPRO	MHC class II, alpha/beta chain, N-terminal	3	0.015
	UP_KEYWORDS	MHC II	3	0.015
	KEGG_PATHWAY	Intestinal immune network for IgA production	3	0.035
	KEGG_PATHWAY	Toxoplasmosis	6	0.075
Annotation Cluster 11	Enrichment Score: 3.94		Count	P_Value
	GOTERM_BP_DIRECT	cellular response to interferon-gamma	8	1.9e-06
	GOTERM_BP_DIRECT	defense response to protozoan	7	2.7e-06
	GOTERM_BP_DIRECT	adhesion of symbiont to host	6	6.1e-06
	GOTERM_BP_DIRECT	defense response to Gram-positive bacterium	9	9.4e-06
	GOTERM_CC_DIRECT	symbiont-containing vacuole membrane	6	1.4e-05
	INTERPRO	Guanylate-binding protein, N-terminal	6	3.6e-05
	INTERPRO	Guanylate-binding protein, C-terminal	6	3.6e-05
	GOTERM_MF_DIRECT	GTP binding	20	0.00079
	GOTERM_MF_DIRECT	GTPase activity	15	0.0017
	GOTERM_CC_DIRECT	cytoplasmic vesicle	17	0.057
	UP_KEYWORDS	GTP-binding	12	0.12
Annotation Cluster 12	Enrichment Score: 3.44		Count	P_Value
	KEGG_PATHWAY	Systemic lupus erythematosus	11	2.4e-06
	UP_KEYWORDS	Complement pathway	8	1.7e-05
	BIOCARTA	Classical Complement Pathway	6	3.5e-05
	GOTERM_BP_DIRECT	complement activation, classical pathway	9	3.6e-05
	KEGG_PATHWAY	Pertussis	9	0.00012
	BIOCARTA	Complement Pathway	6	0.00041
	KEGG_PATHWAY	Prion diseases	7	0.0011
	GOTERM_CC_DIRECT	membrane attack complex	4	0.0011
	KEGG_PATHWAY	Complement and coagulation cascades	9	0.0011
	BIOCARTA	Alternative Complement Pathway	3	0.049
	BIOCARTA	Lectin Induced Complement Pathway	3	0.085
Annotation Cluster 13	Enrichment Score: 2.65		Count	P_Value
	GOTERM_BP_DIRECT	defense response to virus	14	1.2e-08
	UP_KEYWORDS	Antiviral defense	9	4.8e-06
	GOTERM_MF_DIRECT	nucleic acid binding	5	0.99
	GOTERM_MF_DIRECT	RNA binding	9	1
	UP_KEYWORDS	RNA-binding	6	1
Annotation Cluster 14	Enrichment Score: 2.44		Count	P_Value
	GOTERM_BP_DIRECT	negative regulation of mature B cell apoptotic process	4	0.00049
	GOTERM_BP_DIRECT	positive regulation of adaptive immune response	4	0.0012
	GOTERM_BP_DIRECT	positive regulation of ERK1 and ERK2 cascade	9	0.0014
	GOTERM_BP_DIRECT	negative regulation of intrinsic apoptotic signaling pathway in response to DNA damage by p53 class mediator	3	0.0074
	GOTERM_BP_DIRECT	negative regulation of DNA damage response, signal transduction by p53 class mediator	3	0.014
	GOTERM_BP_DIRECT	positive regulation of peptidyl-tyrosine phosphorylation	6	0.026
Annotation Cluster 15	Enrichment Score: 2.32		Count	P_Value
	UP_KEYWORDS	Complement pathway	8	1.7e-05
	KEGG_PATHWAY	Prion diseases	7	0.0011
	GOTERM_CC_DIRECT	membrane attack complex	4	0.0011
	GOTERM_BP_DIRECT	cytolysis	4	0.012
	UP_KEYWORDS	Membrane attack complex	3	0.015
	UP_KEYWORDS	Cytolysis	3	0.024
	GOTERM_BP_DIRECT	complement activation, alternative pathway	3	0.058
	UP_KEYWORDS	Complement alternate pathway	3	0.06
Annotation Cluster 16	Enrichment Score: 1.97		Count	P_Value
	UP_SEQ_FEATURE	topological domain:Extracellular	29	2.9e-06
	UP_SEQ_FEATURE	topological domain:Cytoplasmic	35	0.00087
	UP_SEQ_FEATURE	transmembrane region	46	0.016
	GOTERM_CC_DIRECT	integral component of membrane	52	0.075
	UP_KEYWORDS	Transmembrane helix	52	0.085
	UP_KEYWORDS	Transmembrane	52	0.1
	UP_KEYWORDS	Membrane	79	0.65
Annotation Cluster 17	Enrichment Score: 1.94		Count	P_Value
	UP_SEQ_FEATURE	domain:DAPIN	4	0.00045
	INTERPRO	DAPIN domain	4	0.00051
	SMART	SM01289	4	0.00086
	GOTERM_MF_DIRECT	double-stranded DNA binding	7	0.0052
	UP_SEQ_FEATURE	domain:HIN-200	3	0.0069
	INTERPRO	HIN-200/IF120x	3	0.0076
	GOTERM_MF_DIRECT	transcriptional repressor activity, RNA polymerase II core promoter proximal region sequence-specific binding	4	0.033
	GOTERM_MF_DIRECT	core promoter binding	4	0.039
	GOTERM_MF_DIRECT	transcription factor binding	8	0.11
	GOTERM_MF_DIRECT	RNA polymerase II core promoter proximal region sequence-specific DNA binding	5	0.12
	GOTERM_CC_DIRECT	nucleolus	14	0.49
Annotation Cluster 18	Enrichment Score: 1.93		Count	P_Value
	BIOCARTA	B Lymphocyte Cell Surface Molecules	4	0.004
	GOTERM_BP_DIRECT	leukocyte cell-cell adhesion	5	0.0042
	BIOCARTA	T Cytotoxic Cell Surface Molecules	3	0.034
	BIOCARTA	T Helper Cell Surface Molecules	3	0.034
Annotation Cluster 19	Enrichment Score: 1.88		Count	P_Value
	GOTERM_BP_DIRECT	antigen processing and presentation of endogenous peptide antigen via MHC class I	4	0.0012
	GOTERM_MF_DIRECT	TAP1 binding	3	0.0077
	GOTERM_MF_DIRECT	TAP2 binding	3	0.0077
	GOTERM_CC_DIRECT	TAP complex	3	0.014
	UP_SEQ_FEATURE	topological domain:Lumenal	7	0.41
Annotation Cluster 20	Enrichment Score: 1.73		Count	P_Value
	KEGG_PATHWAY	Prion diseases	7	0.0011
	GOTERM_CC_DIRECT	membrane attack complex	4	0.0011
	INTERPRO	Membrane attack complex component/perforin (MACPF) domain	3	0.015
	INTERPRO	Membrane attack complex component/perforin/complement C9	3	0.015
	INTERPRO	Membrane attack complex component/perforin domain, conserved site	3	0.015
	SMART	MACPF	3	0.021
	INTERPRO	Thrombospondin, type 1 repeat	4	0.038
	SMART	TSP1	4	0.05
	INTERPRO	Low-density lipoprotein (LDL) receptor class A, conserved site	3	0.074
	INTERPRO	Low-density lipoprotein (LDL) receptor class A repeat	3	0.09
	SMART	LDLa	3	0.1
Annotation Cluster 21	Enrichment Score: 1.59		Count	P_Value
	UP_KEYWORDS	Zymogen	11	0.0001
	GOTERM_MF_DIRECT	cysteine-type endopeptidase activity	7	0.00028
	GOTERM_BP_DIRECT	proteolysis involved in cellular protein catabolic process	8	0.0018
	INTERPRO	Proteinase inhibitor I29, cathepsin propeptide	3	0.015
	SMART	SM00848	3	0.021
	UP_KEYWORDS	Thiol protease	7	0.021
	GOTERM_MF_DIRECT	cysteine-type peptidase activity	7	0.024
	INTERPRO	Cysteine peptidase, asparagine active site	3	0.034
	UP_KEYWORDS	Protease	14	0.043
	GOTERM_BP_DIRECT	proteolysis	15	0.045
	INTERPRO	Cysteine peptidase, histidine active site	3	0.046
	GOTERM_MF_DIRECT	peptidase activity	14	0.059
	INTERPRO	Peptidase C1A, papain	3	0.06
	INTERPRO	Peptidase C1A, papain C-terminal	3	0.06
	SMART	Pept_C1	3	0.082
	INTERPRO	Cysteine peptidase, cysteine active site	3	0.11
	UP_SEQ_FEATURE	propeptide:Activation peptide	3	0.15
	GOTERM_MF_DIRECT	endopeptidase activity	5	0.18
	GOTERM_BP_DIRECT	protein processing	3	0.44
Annotation Cluster 22	Enrichment Score: 1.55		Count	P_Value
	GOTERM_BP_DIRECT	leukocyte cell-cell adhesion	5	0.0042
	GOTERM_MF_DIRECT	cell adhesion molecule binding	5	0.06
	GOTERM_BP_DIRECT	heterophilic cell-cell adhesion via plasma membrane cell adhesion molecules	3	0.088
Annotation Cluster 23	Enrichment Score: 1.54		Count	P_Value
	GOTERM_BP_DIRECT	immunoglobulin mediated immune response	4	0.016
	GOTERM_BP_DIRECT	positive regulation of phagocytosis	5	0.023
	GOTERM_BP_DIRECT	phagocytosis, engulfment	4	0.068
Annotation Cluster 24	Enrichment Score: 1.43		Count	P_Value
	KEGG_PATHWAY	Epstein-Barr virus infection	8	0.012
	BIOCARTA	Adhesion Molecules on Lymphocyte	3	0.049
	BIOCARTA	Neutrophil and Its Surface Molecules	3	0.049
	BIOCARTA	Monocyte and its Surface Molecules	3	0.066
Annotation Cluster 25	Enrichment Score: 1.31		Count	P_Value
	GOTERM_BP_DIRECT	positive regulation of extrinsic apoptotic signaling pathway	5	0.0032
	GOTERM_BP_DIRECT	positive regulation of release of cytochrome c from mitochondria	3	0.12
	GOTERM_BP_DIRECT	regulation of apoptotic process	5	0.3
Annotation Cluster 26	Enrichment Score: 1.21		Count	P_Value
	INTERPRO	Death-like domain	6	0.0017
	INTERPRO	Caspase Recruitment	3	0.046
	UP_SEQ_FEATURE	domain:CARD	3	0.055
	GOTERM_BP_DIRECT	positive regulation of cysteine-type endopeptidase activity involved in apoptotic process	4	0.12
	GOTERM_BP_DIRECT	regulation of apoptotic process	5	0.3
	GOTERM_MF_DIRECT	protease binding	4	0.37
Annotation Cluster 27	Enrichment Score: 1.15		Count	P_Value
	UP_KEYWORDS	Hydroxylation	7	0.015
	INTERPRO	Collagen triple helix repeat	4	0.1
	GOTERM_CC_DIRECT	collagen trimer	4	0.12
	UP_KEYWORDS	Collagen	4	0.13
Annotation Cluster 28	Enrichment Score: 1.08		Count	P_Value
	GOTERM_CC_DIRECT	anchored component of membrane	4	0.074
	UP_KEYWORDS	GPI-anchor	4	0.08
	UP_SEQ_FEATURE	propeptide:Removed in mature form	7	0.081
	UP_SEQ_FEATURE	lipid moiety-binding region:GPI-anchor amidated serine	3	0.098
Annotation Cluster 29	Enrichment Score: 1.07		Count	P_Value
	UP_KEYWORDS	Glycosidase	5	0.014
	GOTERM_MF_DIRECT	hydrolase activity, acting on glycosyl bonds	5	0.021
	GOTERM_MF_DIRECT	hydrolase activity, hydrolyzing O-glycosyl compounds	4	0.033
	INTERPRO	Glycoside hydrolase, superfamily	4	0.045
	INTERPRO	Glycosyl hydrolase, family 13, all-beta	3	0.046
	INTERPRO	Glycoside hydrolase, catalytic domain	3	0.12
	UP_SEQ_FEATURE	active site:Nucleophile	7	0.13
	UP_SEQ_FEATURE	active site:Proton donor	6	0.21
	GOTERM_BP_DIRECT	carbohydrate metabolic process	6	0.46
	GOTERM_BP_DIRECT	metabolic process	12	0.56
Annotation Cluster 30	Enrichment Score: 1.06		Count	P_Value
	KEGG_PATHWAY	Hepatitis C	6	0.04
	KEGG_PATHWAY	Measles	5	0.089
	KEGG_PATHWAY	Hepatitis B	5	0.18
Annotation Cluster 31	Enrichment Score: 1.04		Count	P_Value
	UP_SEQ_FEATURE	domain:Fibronectin type-III 8	3	0.031
	UP_SEQ_FEATURE	domain:Fibronectin type-III 7	3	0.043
	UP_SEQ_FEATURE	domain:Fibronectin type-III 6	3	0.055
	UP_SEQ_FEATURE	domain:Fibronectin type-III 5	3	0.069
	UP_SEQ_FEATURE	domain:Fibronectin type-III 1	4	0.072
	UP_SEQ_FEATURE	domain:Fibronectin type-III 2	4	0.072
	UP_SEQ_FEATURE	domain:Fibronectin type-III 4	3	0.098
	UP_SEQ_FEATURE	domain:Fibronectin type-III 3	3	0.13
	UP_KEYWORDS	Extracellular matrix	7	0.16
	INTERPRO	Fibronectin, type III	4	0.25
	SMART	FN3	4	0.26
Annotation Cluster 32	Enrichment Score: 0.93		Count	P_Value
	GOTERM_CC_DIRECT	proteinaceous extracellular matrix	11	0.021
	UP_KEYWORDS	Extracellular matrix	7	0.16
	GOTERM_CC_DIRECT	extracellular matrix	10	0.46
Annotation Cluster 33	Enrichment Score: 0.88		Count	P_Value
	SMART	VWA	5	0.07
	INTERPRO	von Willebrand factor, type A	5	0.13
	UP_SEQ_FEATURE	domain:VWFA	3	0.26
Annotation Cluster 34	Enrichment Score: 0.86		Count	P_Value
	GOTERM_BP_DIRECT	leukocyte cell-cell adhesion	5	0.0042
	GOTERM_MF_DIRECT	integrin binding	5	0.22
	KEGG_PATHWAY	Malaria	3	0.24
	GOTERM_BP_DIRECT	single organismal cell-cell adhesion	4	0.41
	KEGG_PATHWAY	Leukocyte transendothelial migration	4	0.53
Annotation Cluster 35	Enrichment Score: 0.85		Count	P_Value
	KEGG_PATHWAY	Osteoclast differentiation	7	0.012
	KEGG_PATHWAY	Jak-STAT signaling pathway	3	0.14
	UP_KEYWORDS	SH2 domain	4	0.17
	INTERPRO	SH2 domain	4	0.18
	UP_SEQ_FEATURE	domain:SH2	3	0.28
	SMART	SH2	3	0.5
Annotation Cluster 36	Enrichment Score: 0.8		Count	P_Value
	UP_SEQ_FEATURE	domain:Ig-like C2-type 5	3	0.13
	UP_SEQ_FEATURE	domain:Ig-like C2-type 1	4	0.13
	UP_SEQ_FEATURE	domain:Ig-like C2-type 2	4	0.13
	UP_SEQ_FEATURE	domain:Ig-like C2-type 4	3	0.15
	UP_SEQ_FEATURE	domain:Ig-like C2-type 3	3	0.29
Annotation Cluster 37	Enrichment Score: 0.68		Count	P_Value
	GOTERM_MF_DIRECT	GTPase activator activity	7	0.11
	INTERPRO	Rho GTPase activation protein	3	0.23
	UP_KEYWORDS	GTPase activation	4	0.38
Annotation Cluster 38	Enrichment Score: 0.67		Count	P_Value
	INTERPRO	Sterile alpha motif domain	3	0.2
	INTERPRO	Sterile alpha motif/pointed domain	3	0.22
	SMART	SAM	3	0.23
Annotation Cluster 39	Enrichment Score: 0.64		Count	P_Value
	GOTERM_BP_DIRECT	cellular response to interferon-alpha	4	0.0012
	UP_SEQ_FEATURE	repeat:TPR 3	4	0.34
	UP_SEQ_FEATURE	repeat:TPR 4	3	0.35
	INTERPRO	Tetratricopeptide repeat-containing domain	4	0.37
	INTERPRO	Tetratricopeptide repeat	4	0.37
	UP_SEQ_FEATURE	repeat:TPR 2	4	0.38
	UP_SEQ_FEATURE	repeat:TPR 1	4	0.38
	SMART	TPR	4	0.43
	UP_KEYWORDS	TPR repeat	4	0.46
	INTERPRO	Tetratricopeptide-like helical	4	0.7
Annotation Cluster 40	Enrichment Score: 0.62		Count	P_Value
	GOTERM_BP_DIRECT	positive regulation of apoptotic process	11	0.047
	GOTERM_BP_DIRECT	regulation of apoptotic process	5	0.3
	GOTERM_BP_DIRECT	apoptotic process	11	0.41
	UP_KEYWORDS	Apoptosis	9	0.58
Annotation Cluster 41	Enrichment Score: 0.53		Count	P_Value
	UP_SEQ_FEATURE	active site:Phosphocysteine intermediate	3	0.18
	INTERPRO	Protein-tyrosine phosphatase, active site	3	0.2
	INTERPRO	Protein-tyrosine phosphatase, catalytic	3	0.22
	SMART	PTPc_motif	3	0.28
	GOTERM_MF_DIRECT	protein tyrosine phosphatase activity	3	0.3
	GOTERM_BP_DIRECT	dephosphorylation	3	0.5
	GOTERM_MF_DIRECT	phosphatase activity	3	0.58
Annotation Cluster 42	Enrichment Score: 0.52		Count	P_Value
	INTERPRO	Protease inhibitor I4, serpin, conserved site	3	0.25
	GOTERM_MF_DIRECT	serine-type endopeptidase inhibitor activity	4	0.27
	INTERPRO	Serpin domain	3	0.31
	INTERPRO	Serpin family	3	0.31
	SMART	SERPIN	3	0.39
Annotation Cluster 43	Enrichment Score: 0.49		Count	P_Value
	GOTERM_CC_DIRECT	phagocytic cup	4	0.015
	GOTERM_CC_DIRECT	cell projection	11	0.48
	UP_KEYWORDS	Cell projection	10	0.53
	GOTERM_CC_DIRECT	cytoskeleton	13	0.98
	UP_KEYWORDS	Cytoskeleton	12	0.99
Annotation Cluster 44	Enrichment Score: 0.46		Count	P_Value
	UP_KEYWORDS	EGF-like domain	6	0.085
	UP_KEYWORDS	Extracellular matrix	7	0.16
	INTERPRO	EGF-like, conserved site	3	0.63
	INTERPRO	Epidermal growth factor-like domain	3	0.71
	SMART	EGF	3	0.79
Annotation Cluster 45	Enrichment Score: 0.46		Count	P_Value
	UP_SEQ_FEATURE	repeat:7	4	0.22
	UP_SEQ_FEATURE	repeat:5	4	0.26
	UP_SEQ_FEATURE	repeat:6	4	0.26
	UP_SEQ_FEATURE	repeat:4	4	0.35
	UP_SEQ_FEATURE	repeat:3	4	0.39
	UP_SEQ_FEATURE	repeat:1	4	0.55
	UP_SEQ_FEATURE	repeat:2	4	0.56
Annotation Cluster 46	Enrichment Score: 0.45		Count	P_Value
	UP_KEYWORDS	EGF-like domain	6	0.085
	INTERPRO	EGF-type aspartate/asparagine hydroxylation site	3	0.42
	INTERPRO	EGF-like calcium-binding, conserved site	3	0.44
	INTERPRO	EGF-like calcium-binding	3	0.56
	SMART	EGF_CA	3	0.66
Annotation Cluster 47	Enrichment Score: 0.4		Count	P_Value
	UP_KEYWORDS	Iron	8	0.37
	UP_KEYWORDS	Heme	4	0.39
	GOTERM_MF_DIRECT	heme binding	4	0.44
Annotation Cluster 48	Enrichment Score: 0.38		Count	P_Value
	GOTERM_MF_DIRECT	serine-type endopeptidase inhibitor activity	4	0.27
	UP_KEYWORDS	Serine protease inhibitor	3	0.37
	GOTERM_MF_DIRECT	peptidase inhibitor activity	3	0.5
	GOTERM_BP_DIRECT	negative regulation of peptidase activity	3	0.5
	UP_KEYWORDS	Protease inhibitor	3	0.53
Annotation Cluster 49	Enrichment Score: 0.37		Count	P_Value
	KEGG_PATHWAY	Proteasome	4	0.33
	UP_KEYWORDS	Proteasome	4	0.45
	GOTERM_CC_DIRECT	proteasome complex	4	0.51
Annotation Cluster 50	Enrichment Score: 0.35		Count	P_Value
	KEGG_PATHWAY	Apoptosis	3	0.3
	GOTERM_BP_DIRECT	regulation of apoptotic process	5	0.3
	KEGG_PATHWAY	Alzheimer's disease	3	0.98
Annotation Cluster 51	Enrichment Score: 0.31		Count	P_Value
	INTERPRO	P-loop containing nucleoside triphosphate hydrolase	24	0.032
	UP_KEYWORDS	Nucleotide-binding	28	0.91
	GOTERM_MF_DIRECT	nucleotide binding	28	0.99
	UP_KEYWORDS	ATP-binding	13	1
	GOTERM_MF_DIRECT	ATP binding	14	1
Annotation Cluster 52	Enrichment Score: 0.31		Count	P_Value
	UP_KEYWORDS	Iron	8	0.37
	UP_KEYWORDS	Iron-sulfur	3	0.54
	GOTERM_MF_DIRECT	iron-sulfur cluster binding	3	0.59
Annotation Cluster 53	Enrichment Score: 0.27		Count	P_Value
	UP_SEQ_FEATURE	metal ion-binding site:Zinc	5	0.24
	GOTERM_MF_DIRECT	zinc ion binding	12	0.72
	UP_KEYWORDS	Zinc	14	0.92
Annotation Cluster 54	Enrichment Score: 0.25		Count	P_Value
	INTERPRO	EF-hand-like domain	7	0.31
	GOTERM_MF_DIRECT	calcium ion binding	11	0.43
	INTERPRO	EF-hand domain	5	0.49
	UP_SEQ_FEATURE	domain:EF-hand 1	4	0.55
	UP_SEQ_FEATURE	calcium-binding region:2	3	0.6
	UP_SEQ_FEATURE	calcium-binding region:1	3	0.62
	UP_KEYWORDS	Calcium	11	0.69
	UP_SEQ_FEATURE	domain:EF-hand 2	3	0.77
	SMART	EFh	3	0.78
Annotation Cluster 55	Enrichment Score: 0.23		Count	P_Value
	UP_SEQ_FEATURE	binding site:NAD	3	0.35
	UP_KEYWORDS	NAD	6	0.56
	UP_SEQ_FEATURE	nucleotide phosphate-binding region:NAD	3	0.69
	INTERPRO	NAD(P)-binding domain	4	0.93
Annotation Cluster 56	Enrichment Score: 0.22		Count	P_Value
	UP_KEYWORDS	Lipid degradation	3	0.41
	GOTERM_BP_DIRECT	lipid catabolic process	3	0.44
	GOTERM_BP_DIRECT	lipid metabolic process	8	0.8
	UP_KEYWORDS	Lipid metabolism	5	0.96
Annotation Cluster 57	Enrichment Score: 0.21		Count	P_Value
	UP_KEYWORDS	Flavoprotein	6	0.29
	UP_KEYWORDS	FAD	5	0.44
	UP_KEYWORDS	Oxidoreductase	12	0.84
	GOTERM_MF_DIRECT	oxidoreductase activity	12	0.86
	GOTERM_BP_DIRECT	oxidation-reduction process	13	0.92
Annotation Cluster 58	Enrichment Score: 0.17		Count	P_Value
	GOTERM_CC_DIRECT	ruffle membrane	4	0.32
	GOTERM_CC_DIRECT	cell junction	7	0.95
	UP_KEYWORDS	Cell junction	5	0.99
Annotation Cluster 59	Enrichment Score: 0.17		Count	P_Value
	INTERPRO	Zinc finger, LIM-type	3	0.64
	UP_KEYWORDS	LIM domain	3	0.64
	SMART	LIM	3	0.74
Annotation Cluster 60	Enrichment Score: 0.15		Count	P_Value
	INTERPRO	Src homology-3 domain	4	0.68
	UP_KEYWORDS	SH3 domain	4	0.7
	UP_SEQ_FEATURE	domain:SH3	3	0.73
	SMART	SH3	4	0.74
Annotation Cluster 61	Enrichment Score: 0.12		Count	P_Value
	KEGG_PATHWAY	MicroRNAs in cancer	4	0.45
	KEGG_PATHWAY	Focal adhesion	3	0.97
	KEGG_PATHWAY	PI3K-Akt signaling pathway	3	0.98
Annotation Cluster 62	Enrichment Score: 0.06		Count	P_Value
	UP_KEYWORDS	DNA repair	3	0.81
	GOTERM_BP_DIRECT	DNA repair	3	0.85
	UP_KEYWORDS	DNA damage	3	0.87
	GOTERM_BP_DIRECT	cellular response to DNA damage stimulus	3	0.93
Annotation Cluster 63	Enrichment Score: 0.05		Count	P_Value
	GOTERM_MF_DIRECT	transcription factor activity, sequence-specific DNA binding	3	0.73
	GOTERM_MF_DIRECT	DNA binding	7	0.98
	UP_KEYWORDS	DNA-binding	5	0.99
Annotation Cluster 64	Enrichment Score: 0.04		Count	P_Value
	GOTERM_MF_DIRECT	cadherin binding involved in cell-cell adhesion	9	0.89
	GOTERM_CC_DIRECT	cell-cell adherens junction	9	0.91
	GOTERM_BP_DIRECT	cell-cell adhesion	4	0.97
Annotation Cluster 65	Enrichment Score: 0.02		Count	P_Value
	UP_KEYWORDS	Transcription regulation	10	0.92
	UP_KEYWORDS	Transcription	10	0.94
	GOTERM_BP_DIRECT	transcription, DNA-templated	8	0.99
	GOTERM_BP_DIRECT	regulation of transcription, DNA-templated	8	0.99
Annotation Cluster 66	Enrichment Score: 0.02		Count	P_Value
	UP_SEQ_FEATURE	domain:Protein kinase	4	0.9
	UP_SEQ_FEATURE	active site:Proton acceptor	8	0.92
	INTERPRO	Protein kinase, catalytic domain	4	0.92
	GOTERM_MF_DIRECT	transferase activity	16	0.94
	INTERPRO	Protein kinase, ATP binding site	3	0.95
	INTERPRO	Protein kinase-like domain	4	0.95
	GOTERM_BP_DIRECT	phosphorylation	6	0.96
	UP_SEQ_FEATURE	nucleotide phosphate-binding region:ATP	10	0.96
	GOTERM_MF_DIRECT	protein kinase activity	4	0.96
	GOTERM_BP_DIRECT	protein phosphorylation	4	0.97
	UP_KEYWORDS	Transferase	16	0.98
	GOTERM_MF_DIRECT	kinase activity	6	0.98
	UP_KEYWORDS	Kinase	6	0.99
	UP_SEQ_FEATURE	binding site:ATP	3	1
	UP_KEYWORDS	ATP-binding	13	1
	GOTERM_MF_DIRECT	ATP binding	14	1
Annotation Cluster 67	Enrichment Score: 0.01		Count	P_Value
	GOTERM_BP_DIRECT	cell division	3	0.97
	UP_KEYWORDS	Cell division	3	0.97
	GOTERM_BP_DIRECT	cell cycle	3	1
	UP_KEYWORDS	Cell cycle	3	1

## Sheet: Decreased
Annotation Cluster 1	Enrichment Score: 10.42		Count	P_Value
	UP_KEYWORDS	Mitochondrion	67	3.2e-16
	GOTERM_CC_DIRECT	mitochondrion	75	6.9e-13
	UP_KEYWORDS	Transit peptide	40	4.3e-10
	UP_SEQ_FEATURE	transit peptide:Mitochondrion	36	1.2e-09
	KEGG_PATHWAY	Metabolic pathways	40	7.2e-07
Annotation Cluster 2	Enrichment Score: 4.17		Count	P_Value
	UP_SEQ_FEATURE	transmembrane region	46	8.9e-07
	GOTERM_CC_DIRECT	integral component of membrane	53	3.2e-06
	UP_KEYWORDS	Transmembrane helix	53	3.6e-06
	UP_KEYWORDS	Transmembrane	53	5.8e-06
	UP_KEYWORDS	Membrane	69	0.011
	GOTERM_CC_DIRECT	membrane	73	0.15
Annotation Cluster 3	Enrichment Score: 4.16		Count	P_Value
	GOTERM_BP_DIRECT	oxidation-reduction process	31	1.8e-07
	GOTERM_MF_DIRECT	oxidoreductase activity	23	4.9e-05
	UP_KEYWORDS	Oxidoreductase	23	0.00015
	UP_KEYWORDS	NAD	9	0.018
Annotation Cluster 4	Enrichment Score: 3.92		Count	P_Value
	UP_KEYWORDS	Mitochondrion inner membrane	24	4.7e-08
	GOTERM_BP_DIRECT	oxidation-reduction process	31	1.8e-07
	KEGG_PATHWAY	Oxidative phosphorylation	16	4.4e-07
	GOTERM_CC_DIRECT	respiratory chain	12	8e-07
	UP_KEYWORDS	Respiratory chain	12	1.5e-06
	KEGG_PATHWAY	Parkinson's disease	15	2.7e-06
	UP_KEYWORDS	Electron transport	13	6.4e-06
	KEGG_PATHWAY	Alzheimer's disease	14	5.4e-05
	GOTERM_MF_DIRECT	NADH dehydrogenase (ubiquinone) activity	7	0.00026
	GOTERM_CC_DIRECT	mitochondrial respiratory chain complex I	8	0.00043
	KEGG_PATHWAY	Huntington's disease	12	0.00087
	UP_KEYWORDS	Ubiquinone	6	0.00093
	KEGG_PATHWAY	Non-alcoholic fatty liver disease (NAFLD)	10	0.0028
	GOTERM_MF_DIRECT	NADH dehydrogenase activity	4	0.0074
	GOTERM_BP_DIRECT	transport	31	0.02
	GOTERM_MF_DIRECT	oxidoreductase activity, acting on NAD(P)H	3	0.039
	UP_KEYWORDS	Transport	31	0.046
	GOTERM_BP_DIRECT	mitochondrial respiratory chain complex I assembly	3	0.096
Annotation Cluster 5	Enrichment Score: 3.14		Count	P_Value
	KEGG_PATHWAY	Fatty acid degradation	9	1.2e-05
	KEGG_PATHWAY	Fatty acid metabolism	8	7.1e-05
	GOTERM_BP_DIRECT	fatty acid metabolic process	12	0.00015
	UP_KEYWORDS	Fatty acid metabolism	10	0.00065
	GOTERM_BP_DIRECT	fatty acid beta-oxidation	6	0.0023
	UP_KEYWORDS	Lipid metabolism	14	0.0026
	GOTERM_BP_DIRECT	lipid metabolic process	14	0.0049
	KEGG_PATHWAY	PPAR signaling pathway	5	0.033
Annotation Cluster 6	Enrichment Score: 2.54		Count	P_Value
	GOTERM_CC_DIRECT	intercalated disc	7	0.0015
	GOTERM_BP_DIRECT	regulation of ventricular cardiac muscle cell membrane repolarization	4	0.0026
	GOTERM_BP_DIRECT	regulation of ventricular cardiac muscle cell membrane depolarization	3	0.0062
Annotation Cluster 7	Enrichment Score: 2.4		Count	P_Value
	COG_ONTOLOGY	Lipid metabolism	10	7.9e-06
	GOTERM_MF_DIRECT	oxidoreductase activity, acting on the CH-CH group of donors	6	0.00043
	INTERPRO	Acyl-CoA dehydrogenase/oxidase, N-terminal	5	0.00071
	GOTERM_MF_DIRECT	oxidoreductase activity, acting on the CH-CH group of donors, with a flavin as acceptor	5	0.0008
	INTERPRO	Acyl-CoA oxidase/dehydrogenase, central domain	5	0.00096
	INTERPRO	Acyl-CoA dehydrogenase/oxidase C-terminal	5	0.00096
	INTERPRO	Acyl-CoA dehydrogenase/oxidase	5	0.00096
	GOTERM_MF_DIRECT	fatty-acyl-CoA binding	6	0.001
	GOTERM_MF_DIRECT	acyl-CoA dehydrogenase activity	5	0.0011
	GOTERM_BP_DIRECT	fatty acid beta-oxidation using acyl-CoA dehydrogenase	5	0.0019
	GOTERM_MF_DIRECT	electron carrier activity	7	0.002
	INTERPRO	Acyl-CoA dehydrogenase, conserved site	4	0.0027
	GOTERM_MF_DIRECT	long-chain-acyl-CoA dehydrogenase activity	3	0.003
	GOTERM_BP_DIRECT	lipid homeostasis	5	0.0044
	UP_SEQ_FEATURE	binding site:Substrate; via carbonyl oxygen	4	0.0062
	GOTERM_MF_DIRECT	flavin adenine dinucleotide binding	6	0.0095
	UP_SEQ_FEATURE	binding site:FAD	4	0.014
	UP_KEYWORDS	FAD	7	0.025
	UP_SEQ_FEATURE	binding site:Substrate; via amide nitrogen	4	0.03
	UP_KEYWORDS	Flavoprotein	7	0.033
	UP_SEQ_FEATURE	nucleotide phosphate-binding region:FAD	4	0.12
	GOTERM_CC_DIRECT	mitochondrial membrane	5	0.12
	UP_SEQ_FEATURE	region of interest:Substrate binding	3	0.62
Annotation Cluster 8	Enrichment Score: 2.18		Count	P_Value
	UP_KEYWORDS	Tricarboxylic acid cycle	6	0.00093
	KEGG_PATHWAY	Biosynthesis of antibiotics	14	0.00098
	GOTERM_BP_DIRECT	tricarboxylic acid cycle	6	0.0014
	KEGG_PATHWAY	Citrate cycle (TCA cycle)	6	0.0035
	KEGG_PATHWAY	Carbon metabolism	8	0.032
	GOTERM_BP_DIRECT	NADH metabolic process	3	0.049
	GOTERM_BP_DIRECT	2-oxoglutarate metabolic process	3	0.076
Annotation Cluster 9	Enrichment Score: 2.14		Count	P_Value
	GOTERM_CC_DIRECT	peroxisome	9	0.0018
	UP_KEYWORDS	Peroxisome	7	0.0092
	KEGG_PATHWAY	Peroxisome	6	0.022
Annotation Cluster 10	Enrichment Score: 1.75		Count	P_Value
	GOTERM_CC_DIRECT	intercalated disc	7	0.0015
	UP_KEYWORDS	Sodium	4	0.004
	UP_KEYWORDS	Sodium transport	4	0.004
	GOTERM_CC_DIRECT	T-tubule	6	0.0045
	GOTERM_BP_DIRECT	sodium ion transport	4	0.0048
	GOTERM_BP_DIRECT	ion transport	8	0.028
	GOTERM_BP_DIRECT	regulation of cardiac muscle cell contraction	3	0.033
	UP_KEYWORDS	Ion transport	8	0.038
	GOTERM_CC_DIRECT	sarcolemma	6	0.13
	GOTERM_CC_DIRECT	caveola	4	0.14
	KEGG_PATHWAY	Adrenergic signaling in cardiomyocytes	5	0.16
Annotation Cluster 11	Enrichment Score: 1.51		Count	P_Value
	GOTERM_CC_DIRECT	T-tubule	6	0.0045
	GOTERM_BP_DIRECT	potassium ion import	3	0.027
	GOTERM_BP_DIRECT	ion transport	8	0.028
	UP_KEYWORDS	Potassium	4	0.034
	UP_KEYWORDS	Ion transport	8	0.038
	UP_KEYWORDS	Potassium transport	3	0.053
	GOTERM_BP_DIRECT	potassium ion transport	3	0.12
Annotation Cluster 12	Enrichment Score: 1.31		Count	P_Value
	SMART	SM00831	3	0.0076
	GOTERM_BP_DIRECT	negative regulation of heart contraction	3	0.015
	INTERPRO	P-type ATPase, transmembrane domain	3	0.016
	INTERPRO	Cation-transporting P-type ATPase, N-terminal	3	0.016
	INTERPRO	Cation-transporting P-type ATPase, C-terminal	3	0.016
	UP_SEQ_FEATURE	active site:4-aspartylphosphate intermediate	3	0.02
	GOTERM_BP_DIRECT	ion transport	8	0.028
	INTERPRO	Cation-transporting P-type ATPase	3	0.035
	INTERPRO	P-type ATPase, phosphorylation site	3	0.035
	INTERPRO	P-type ATPase, cytoplasmic domain N	3	0.035
	INTERPRO	P-type ATPase, A domain	3	0.035
	UP_KEYWORDS	Ion transport	8	0.038
	KEGG_PATHWAY	Pancreatic secretion	4	0.075
	GOTERM_CC_DIRECT	integral component of plasma membrane	8	0.079
	INTERPRO	HAD-like domain	4	0.099
	GOTERM_BP_DIRECT	regulation of the force of heart contraction	3	0.11
	KEGG_PATHWAY	cGMP-PKG signaling pathway	4	0.33
	UP_SEQ_FEATURE	metal ion-binding site:Magnesium	3	0.47
	UP_SEQ_FEATURE	topological domain:Lumenal	3	0.87
Annotation Cluster 13	Enrichment Score: 1.21		Count	P_Value
	INTERPRO	Fibronectin, type III	5	0.026
	SMART	FN3	4	0.029
	UP_SEQ_FEATURE	domain:Fibronectin type-III 2	3	0.14
	UP_SEQ_FEATURE	domain:Fibronectin type-III 1	3	0.14
Annotation Cluster 14	Enrichment Score: 1.08		Count	P_Value
	GOTERM_BP_DIRECT	ion transport	8	0.028
	UP_KEYWORDS	Ion transport	8	0.038
	GOTERM_MF_DIRECT	voltage-gated ion channel activity	3	0.1
	UP_KEYWORDS	Voltage-gated channel	3	0.11
	GOTERM_BP_DIRECT	regulation of ion transmembrane transport	3	0.12
	UP_KEYWORDS	Ion channel	3	0.21
Annotation Cluster 15	Enrichment Score: 1.08		Count	P_Value
	UP_SEQ_FEATURE	repeat:Solcar 3	4	0.026
	UP_SEQ_FEATURE	repeat:Solcar 2	4	0.038
	UP_SEQ_FEATURE	repeat:Solcar 1	4	0.038
	INTERPRO	Mitochondrial carrier domain	4	0.046
	INTERPRO	Mitochondrial substrate/solute carrier	4	0.046
	GOTERM_MF_DIRECT	structural constituent of ribosome	6	0.57
	GOTERM_BP_DIRECT	translation	9	0.6
Annotation Cluster 16	Enrichment Score: 1.03		Count	P_Value
	UP_KEYWORDS	Acyltransferase	7	0.0069
	GOTERM_MF_DIRECT	transferase activity, transferring acyl groups	6	0.02
	UP_KEYWORDS	Transferase	15	0.73
	GOTERM_MF_DIRECT	transferase activity	12	0.76
Annotation Cluster 17	Enrichment Score: 0.92		Count	P_Value
	INTERPRO	Immunoglobulin-like fold	14	0.012
	SMART	IG	6	0.063
	INTERPRO	Immunoglobulin-like domain	9	0.13
	UP_KEYWORDS	Immunoglobulin domain	6	0.17
	INTERPRO	Immunoglobulin subtype	6	0.2
	SMART	IGv	4	0.29
	INTERPRO	Immunoglobulin V-set	5	0.36
Annotation Cluster 18	Enrichment Score: 0.89		Count	P_Value
	GOTERM_MF_DIRECT	ion channel binding	6	0.031
	GOTERM_BP_DIRECT	regulation of heart rate	3	0.12
	GOTERM_CC_DIRECT	Z disc	4	0.6
Annotation Cluster 19	Enrichment Score: 0.78		Count	P_Value
	GOTERM_CC_DIRECT	intercalated disc	7	0.0015
	KEGG_PATHWAY	Insulin secretion	4	0.052
	KEGG_PATHWAY	Pancreatic secretion	4	0.075
	GOTERM_CC_DIRECT	sarcolemma	6	0.13
	KEGG_PATHWAY	Bile secretion	3	0.14
	KEGG_PATHWAY	Endocrine and other factor-regulated calcium reabsorption	3	0.15
	KEGG_PATHWAY	Adrenergic signaling in cardiomyocytes	5	0.16
	KEGG_PATHWAY	Thyroid hormone synthesis	3	0.17
	KEGG_PATHWAY	Gastric acid secretion	3	0.22
	KEGG_PATHWAY	Salivary secretion	3	0.22
	KEGG_PATHWAY	cGMP-PKG signaling pathway	4	0.33
	KEGG_PATHWAY	cAMP signaling pathway	3	0.61
	GOTERM_CC_DIRECT	membrane raft	4	0.66
	GOTERM_MF_DIRECT	protein kinase binding	4	0.9
	GOTERM_CC_DIRECT	endosome	5	0.95
Annotation Cluster 20	Enrichment Score: 0.7		Count	P_Value
	UP_SEQ_FEATURE	metal ion-binding site:Magnesium or manganese	3	0.041
	UP_KEYWORDS	Manganese	4	0.38
	GOTERM_MF_DIRECT	magnesium ion binding	4	0.51
Annotation Cluster 21	Enrichment Score: 0.54		Count	P_Value
	UP_SEQ_FEATURE	glycosylation site:N-linked (GlcNAc...)	23	0.17
	UP_KEYWORDS	Glycoprotein	27	0.18
	UP_SEQ_FEATURE	signal peptide	17	0.77
Annotation Cluster 22	Enrichment Score: 0.54		Count	P_Value
	KEGG_PATHWAY	Propanoate metabolism	4	0.047
	UP_KEYWORDS	Ligase	6	0.39
	GOTERM_MF_DIRECT	ligase activity	6	0.4
	GOTERM_MF_DIRECT	nucleotide binding	15	0.99
Annotation Cluster 23	Enrichment Score: 0.51		Count	P_Value
	UP_SEQ_FEATURE	topological domain:Cytoplasmic	19	0.11
	UP_SEQ_FEATURE	topological domain:Extracellular	11	0.2
	UP_KEYWORDS	Cell membrane	18	0.61
	GOTERM_CC_DIRECT	plasma membrane	28	0.7
Annotation Cluster 24	Enrichment Score: 0.4		Count	P_Value
	GOTERM_CC_DIRECT	endoplasmic reticulum membrane	11	0.24
	GOTERM_CC_DIRECT	endoplasmic reticulum	18	0.4
	UP_KEYWORDS	Endoplasmic reticulum	12	0.65
Annotation Cluster 25	Enrichment Score: 0.4		Count	P_Value
	UP_KEYWORDS	Extracellular matrix	6	0.1
	GOTERM_CC_DIRECT	proteinaceous extracellular matrix	7	0.11
	GOTERM_CC_DIRECT	basement membrane	3	0.47
	UP_KEYWORDS	Secreted	12	0.6
	GOTERM_CC_DIRECT	extracellular region	12	0.69
	UP_SEQ_FEATURE	signal peptide	17	0.77
	GOTERM_CC_DIRECT	extracellular space	8	0.98
Annotation Cluster 26	Enrichment Score: 0.39		Count	P_Value
	UP_KEYWORDS	Iron-sulfur	3	0.34
	GOTERM_MF_DIRECT	iron-sulfur cluster binding	3	0.35
	UP_KEYWORDS	Iron	5	0.56
Annotation Cluster 27	Enrichment Score: 0.39		Count	P_Value
	UP_KEYWORDS	Extracellular matrix	6	0.1
	KEGG_PATHWAY	ECM-receptor interaction	3	0.44
	GOTERM_BP_DIRECT	cell adhesion	5	0.75
	UP_KEYWORDS	Cell adhesion	4	0.85
Annotation Cluster 28	Enrichment Score: 0.37		Count	P_Value
	UP_SEQ_FEATURE	repeat:TPR 3	3	0.41
	UP_SEQ_FEATURE	repeat:TPR 2	3	0.44
	UP_SEQ_FEATURE	repeat:TPR 1	3	0.44
Annotation Cluster 29	Enrichment Score: 0.27		Count	P_Value
	GOTERM_CC_DIRECT	chromosome, centromeric region	3	0.39
	UP_KEYWORDS	Centromere	3	0.4
	GOTERM_CC_DIRECT	chromosome	3	0.7
	UP_KEYWORDS	Chromosome	3	0.73
Annotation Cluster 30	Enrichment Score: 0.2		Count	P_Value
	GOTERM_CC_DIRECT	synaptic vesicle	3	0.36
	GOTERM_CC_DIRECT	synapse	5	0.48
	UP_KEYWORDS	Synapse	3	0.69
	GOTERM_CC_DIRECT	cell junction	5	0.93
	UP_KEYWORDS	Cell junction	4	0.96
Annotation Cluster 31	Enrichment Score: 0.15		Count	P_Value
	GOTERM_CC_DIRECT	mitochondrial small ribosomal subunit	3	0.21
	GOTERM_CC_DIRECT	intracellular ribonucleoprotein complex	5	0.95
	GOTERM_CC_DIRECT	ribosome	3	0.96
	UP_KEYWORDS	Ribosomal protein	3	0.97
	UP_KEYWORDS	Ribonucleoprotein	3	1
Annotation Cluster 32	Enrichment Score: 0.13		Count	P_Value
	GOTERM_MF_DIRECT	ATP binding	18	0.48
	UP_KEYWORDS	ATP-binding	16	0.69
	UP_KEYWORDS	Nucleotide-binding	17	0.95
	GOTERM_MF_DIRECT	nucleotide binding	15	0.99
Annotation Cluster 33	Enrichment Score: 0.08		Count	P_Value
	UP_KEYWORDS	Differentiation	4	0.76
	UP_KEYWORDS	Developmental protein	4	0.84
	GOTERM_BP_DIRECT	cell differentiation	4	0.85
	GOTERM_BP_DIRECT	multicellular organism development	4	0.85
Annotation Cluster 34	Enrichment Score: 0.07		Count	P_Value
	GOTERM_BP_DIRECT	cell division	4	0.66
	UP_KEYWORDS	Cell division	3	0.87
	GOTERM_BP_DIRECT	cell cycle	3	0.96
	UP_KEYWORDS	Cell cycle	3	0.97
Annotation Cluster 35	Enrichment Score: 0.04		Count	P_Value
	GOTERM_MF_DIRECT	peptidase activity	4	0.89
	UP_KEYWORDS	Protease	4	0.9
	GOTERM_BP_DIRECT	proteolysis	4	0.92
Annotation Cluster 36	Enrichment Score: 0.04		Count	P_Value
	INTERPRO	Protein kinase-like domain	4	0.78
	INTERPRO	Protein kinase, ATP binding site	3	0.82
	INTERPRO	Protein kinase, catalytic domain	3	0.89
	UP_SEQ_FEATURE	binding site:ATP	4	0.91
	GOTERM_MF_DIRECT	protein kinase activity	3	0.92
	GOTERM_BP_DIRECT	protein phosphorylation	3	0.94
	GOTERM_MF_DIRECT	kinase activity	4	0.97
	UP_KEYWORDS	Kinase	4	0.98
	GOTERM_BP_DIRECT	phosphorylation	3	0.99
	UP_SEQ_FEATURE	nucleotide phosphate-binding region:ATP	5	0.99
